# Supplementary material
Source: PubMed Central journal article supplement (PMC9989621)
Supplement: ajcr0013-0654-f4.pdf [file ajcr0013-0654-f4.pdf]

## CRAFITY score and AFP response predicts treatment outcomes of PD-1 based therapy

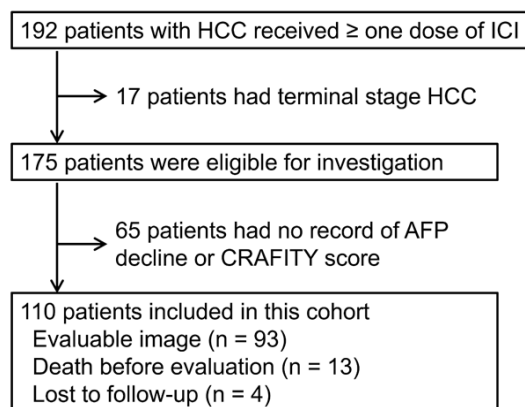

**Supplementary Figure 1.** Flowchart of patient recruitment. AFP,  $\alpha$ -fetoprotein; CRAFITY, C-reactive protein and  $\alpha$ -fetoprotein in immunotherapy; HCC, hepatocellular carcinoma; ICI, immune checkpoint inhibitor.

**Supplementary Table 1.** Patient demographics, baseline characteristics, and therapeutic response

| Character                             | Eligible for investigation<br>(n = 175) | Enrolled<br>(n = 110) | Excluded<br>(n = 65)  | P value |
|---------------------------------------|-----------------------------------------|-----------------------|-----------------------|---------|
| Age (years)                           | 64.9 (55.9-72.0)                        | 64.5 (54.6-72.4)      | 65.3 (58.4-70.5)      | .461    |
| Sex (male), n (%)                     | 148 (84.6)                              | 94 (85.5)             | 54 (83.1)             | .675    |
| Body mass index (kg/m <sup>2</sup> )  | 23.67 (21.38-26.35)                     | 23.43 (20.96-26.72)   | 24.05 (22.18-26.16)   | .387    |
| NLR                                   | 5.02 (2.96-7.91)                        | 5.34 (3.01-8.28)      | 4.43 (2.78-6.41)      | .126    |
| Platelet count ( $\times 10^9/L$ )    | 159 (104-239)                           | 174 (109-251)         | 137 (88-207)          | .014    |
| AST (U/L)                             | 50 (32-89)                              | 48 (32-92)            | 52 (32-82)            | .912    |
| ALT (U/L)                             | 37 (25-60)                              | 35 (23-57)            | 39 (27-66)            | .211    |
| Total bilirubin (mg/dL)               | 0.93 (0.69-1.40)                        | 0.97 (0.66-1.60)      | 0.92 (0.70-1.35)      | .627    |
| Albumin (g/dL)                        | 3.6 (3.3-4.0)                           | 3.6 (3.3-4.0)         | 3.7 (3.3-4.1)         | .467    |
| INR                                   | 1.07 (1.01-1.17)                        | 1.06 (1.01-1.17)      | 1.08 (1.02-1.16)      | .507    |
| Etiology                              |                                         |                       |                       |         |
| Alcohol                               | 45 (25.7)                               | 35 (31.8)             | 10 (15.4)             | .017    |
| HBV                                   | 95 (54.3)                               | 62 (56.4)             | 33 (50.8)             | .474    |
| HCV                                   | 47 (26.9)                               | 27 (24.5)             | 20 (30.8)             | .371    |
| Diabetes mellitus                     | 58 (33.1)                               | 29 (26.4)             | 29 (44.6)             | .013    |
| Liver cirrhosis                       | 134 (76.6)                              | 84 (76.4)             | 50 (76.9)             | .933    |
| Child-Pugh score                      | 6 (5-7)                                 | 6 (5-7)               | 6 (5-7)               | .945    |
| Child-Pugh class A                    | 113 (64.6)                              | 72 (66.1)             | 41 (64.1)             |         |
| Child-Pugh class B                    | 60 (34.3)                               | 37 (33.9)             | 23 (35.9)             |         |
| ALBI grade                            |                                         |                       |                       | .680    |
| 1                                     | 52 (30.2)                               | 33 (30.6)             | 19 (29.7)             |         |
| 2                                     | 105 (61.0)                              | 67 (62.0)             | 38 (59.4)             |         |
| 3                                     | 15 (8.7)                                | 8 (7.4)               | 7 (10.9)              |         |
| AFP (ng/mL)                           | 114.53 (8.84-3220.50)                   | 126.48 (12.25-5056.0) | 103.61 (6.39-1548.92) | .197    |
| BCLC stage                            |                                         |                       |                       | .766    |
| A                                     | 11 (6.3)                                | 6 (5.5)               | 5 (7.7)               |         |
| B                                     | 25 (14.3)                               | 16 (14.5)             | 9 (13.8)              |         |
| C                                     | 139 (79.4)                              | 88 (80.0)             | 51 (78.5)             |         |
| Max. tumor size (cm)                  | 4.7 (2.5-8.9)                           | 4.7 (2.7-9.7)         | 4.4 (1.8-7.7)         | .097    |
| Total tumor volume (cm <sup>3</sup> ) | 703.9 (124.3-4042.1)                    | 740.4 (143.1-5339.6)  | 680.2 (48.0-2755.5)   | .102    |
| MVI <sup>a</sup>                      | 89 (50.9)                               | 65 (59.1)             | 24 (36.9)             | .005    |
| VP3                                   | 30 (17.1)                               | 24 (21.8)             | 6 (9.2)               |         |
| VP4                                   | 50 (28.6)                               | 34 (30.9)             | 16 (24.6)             |         |
| Hepatic vein                          | 9 (5.1)                                 | 7 (6.4)               | 2 (3.1)               |         |
| EHM <sup>a</sup>                      | 102 (58.3)                              | 61 (55.5)             | 41 (63.1)             | .324    |

## CRAFITY score and AFP response predicts treatment outcomes of PD-1 based therapy

|                                                                                              |                                           |                                           |                                          |      |
|----------------------------------------------------------------------------------------------|-------------------------------------------|-------------------------------------------|------------------------------------------|------|
| Prior therapy                                                                                |                                           |                                           |                                          |      |
| Sorafenib                                                                                    | 102 (58.3)                                | 63 (57.3)                                 | 39 (60.0)                                |      |
| Lenvatinib                                                                                   | 28 (16.0)                                 | 19 (17.3)                                 | 9 (13.8)                                 |      |
| Surgery                                                                                      | 37 (21.1)                                 | 21 (19.1)                                 | 16 (24.6)                                |      |
| PEI/RFA                                                                                      | 12 (6.9)/38 (21.7)                        | 7 (6.4)/20 (18.2)                         | 5 (7.7)/18 (27.7)                        |      |
| TACE <sup>b</sup> /TARE                                                                      | 109 (62.3)/3 (1.7)                        | 66 (60.0)/3 (2.7)                         | 43 (66.2)/0 (0)                          |      |
| Radiotherapy                                                                                 | 3 (1.7)                                   | 3 (2.7)                                   | 0 (0)                                    |      |
| ICI duration (months)                                                                        | 3.27 (1.70-8.40)                          | 2.85 (1.67-6.63)                          | 4.20 (1.90-11.87)                        | .118 |
| Nivolumab <sup>c</sup>                                                                       | 157 (89.7)                                | 100 (90.9)                                | 57 (87.7)                                |      |
| Nivolumab + ipilimumab <sup>c</sup>                                                          | 5 (2.9)                                   | 3 (2.7)                                   | 2 (3.1)                                  |      |
| Pembrolizumab <sup>c</sup>                                                                   | 19 (10.9)                                 | 12 (10.9)                                 | 7 (10.8)                                 |      |
| Reduction > 25%                                                                              | 92 (52.6)                                 | 59 (53.6)                                 | 33 (50.8)                                |      |
| As 1 <sup>st</sup> /2 <sup>nd</sup> /3 <sup>rd</sup> /4 <sup>th</sup> -line systemic therapy | 55 (31.4)/88 (50.3)/<br>24 (13.7)/8 (4.6) | 35 (31.8)/53 (48.2)/<br>16 (14.5)/6 (5.5) | 20 (30.8)/35 (53.8)/<br>8 (12.3)/2 (3.1) |      |
| Concurrent therapy                                                                           |                                           |                                           |                                          |      |
| Sorafenib <sup>d</sup>                                                                       | 135 (77.1)                                | 87 (79.1)                                 | 48 (73.8)                                | .426 |
| Lenvatinib <sup>d</sup>                                                                      | 62 (35.4)                                 | 43 (39.1)                                 | 19 (29.2)                                |      |
| Regorafenib <sup>d</sup>                                                                     | 52 (29.7)                                 | 32 (29.1)                                 | 20 (30.8)                                |      |
| Regorafenib <sup>d</sup>                                                                     | 27 (15.4)                                 | 17 (15.5)                                 | 10 (15.4)                                |      |
| RFA                                                                                          | 3 (1.7)                                   | 3 (2.7)                                   | 0 (0)                                    |      |
| TACE                                                                                         | 26 (14.9)                                 | 14 (12.7)                                 | 12 (18.5)                                |      |
| Liver radiotherapy                                                                           | 35 (20.0)                                 | 20 (18.2)                                 | 15 (23.1)                                |      |
| Therapeutic response                                                                         |                                           |                                           |                                          |      |
| Best Response                                                                                |                                           |                                           |                                          |      |
| Complete response                                                                            | 14 (8.0)                                  | 7 (6.4)                                   | 7 (10.8)                                 |      |
| Partial response                                                                             | 29 (16.6)                                 | 17 (15.5)                                 | 12 (18.5)                                |      |
| Stable disease                                                                               | 46 (26.3)                                 | 27 (24.5)                                 | 19 (29.2)                                |      |
| Progressive disease                                                                          | 86 (49.1)                                 | 59 (53.6)                                 | 27 (41.5)                                |      |
| Not evaluable                                                                                |                                           |                                           |                                          |      |
| Death before evaluation                                                                      | 23 (13.1)                                 | 13 (11.8)                                 | 10 (15.4)                                |      |
| Lost to follow-up <sup>e</sup>                                                               | 5 (2.9)                                   | 4 (3.6)                                   | 1 (1.5)                                  |      |
| Objective response                                                                           | 43 (24.6)                                 | 24 (21.8)                                 | 19 (29.2)                                | .272 |
| Disease control                                                                              | 89 (50.9)                                 | 51 (46.4)                                 | 38 (58.5)                                | .123 |
| Progression-free survival (months) <sup>*</sup>                                              | 3.63 (2.27-5.00)                          | 2.87 (2.16-3.58)                          | 5.87 (2.47-9.26)                         | .127 |
| Overall survival (months) <sup>*</sup>                                                       | 14.53 (9.68-19.38)                        | 8.20 (4.23-12.17)                         | 23.23 (16.00-30.47)                      | .010 |

Data presented as median (first quartile-third quartile). \*Data presented as median (95% confidence interval). AFP,  $\alpha$ -fetoprotein; ALBI, albumin-bilirubin; ALT, alanine aminotransferase; AST, aspartate aminotransferase; BCLC, Barcelona Clinic Liver Cancer; EHM, extrahepatic metastasis; HBV, hepatitis B virus; HCV, hepatitis C virus; ICI, immune checkpoint inhibitor; MVI, macrovascular invasion; NLR, neutrophil-lymphocyte ratio; TACE, transarterial chemoembolization; TARE, transarterial radioembolization; TKI, tyrosine kinase inhibitor; PEI, percutaneous ethanol injection; INR, international normalized ratio; RFA, radiofrequency ablation. <sup>a</sup>Fifty-two patients with HCC had both macrovascular invasion and extrahepatic metastasis. <sup>b</sup>The median number of TACE sessions was 3 (2-5). <sup>c</sup>Seven patients received sequential ICI therapy because of progressive disease: nivolumab→atezolizumab plus bevacizumab (1), nivolumab→pembrolizumab→atezolizumab plus bevacizumab (n = 1), nivolumab→pembrolizumab→nivolumab (2), nivolumab→atezolizumab plus bevacizumab→nivolumab plus ipilimumab (1), nivolumab→atezolizumab plus bevacizumab→pembrolizumab (1), and nivolumab plus ipilimumab→nivolumab plus sorafenib (1). <sup>d</sup>Twenty-eight patients received sequential TKI therapy because of progressive disease: sorafenib→regorafenib (13), sorafenib→lenvatinib (4), sorafenib→regorafenib→lenvatinib (2), lenvatinib→sorafenib (2), lenvatinib→regorafenib (1), sorafenib→ramucizumab (1), and lenvatinib→cabozantinib (5). <sup>e</sup>Five patients were lost to follow-up because of immune-related adverse events.

CRAFITY score and AFP response predicts treatment outcomes of PD-1 based therapy

**Supplementary Table 2.** TRAEs in 110 patients with hepatocellular carcinoma

| Type of TRAE (n = 74) | TRAE, n (%) |           |
|-----------------------|-------------|-----------|
|                       | Any grade   | Grade ≥ 3 |
| Hepatitis*            | 25 (22.7)   | 12 (10.9) |
| Fatigue               | 16 (14.5)   | 3 (2.7)   |
| Dermatitis            | 15 (13.6)   | 5 (4.5)   |
| Hand foot syndrome    | 15 (13.6)   | 3 (2.7)   |
| Colitis               | 10 (9.1)    | 2 (1.8)   |
| Fever                 | 8 (7.3)     | 1 (0.9)   |
| Pneumonitis*          | 5 (4.5)     | 4 (3.6)   |
| Proteinuria           | 2 (1.8)     | 0 (0)     |
| Gastric necrosis      | 1 (0.9)     | 1 (1.1)   |
| Thyroid disorder      | 1 (0.9)     | 0 (0)     |
| Edema                 | 1 (0.9)     | 0 (0)     |

\*Among seven patients who died from TRAEs, five and two died from severe hepatitis and pneumonitis, respectively. TRAEs, treatment-related adverse events.

## CRAFITY score and AFP response predicts treatment outcomes of PD-1 based therapy

**Supplementary Table 3.** Factors associated with disease control in 93 patients with HCC who underwent radiological imaging

| Character                                            |                  | Univariate analysis  |         | Multivariable analysis 1 |         | Multivariable analysis 2 |         |
|------------------------------------------------------|------------------|----------------------|---------|--------------------------|---------|--------------------------|---------|
|                                                      |                  | OR (95% CI)          | P value | OR (95% CI)              | P value | OR (95% CI)              | P value |
| Age (year)                                           |                  | 1.027 (0.993-1.062)  | .128    |                          |         |                          |         |
| Sex                                                  | M vs F           | 2.045 (0.663-6.309)  | .213    |                          |         |                          |         |
| Alcohol                                              | Yes vs no        | 0.914 (0.382-2.188)  | .840    |                          |         |                          |         |
| HBV                                                  | Yes vs no        | 0.896 (0.391-2.053)  | .796    |                          |         |                          |         |
| HCV                                                  | Yes vs no        | 1.387 (0.531-3.623)  | .504    |                          |         |                          |         |
| DM                                                   | Yes vs no        | 1.211 (0.473-3.098)  | .690    |                          |         |                          |         |
| Grade 1-2 TRAEs                                      | Yes vs no        | 1.828 (0.797-4.196)  | .155    |                          |         |                          |         |
| Grade ≥ 3 TRAEs                                      | Yes vs no        | 0.880 (0.332-2.332)  | .797    |                          |         |                          |         |
| TTV (cm <sup>3</sup> )                               | > 1000 vs ≤ 1000 | 0.792 (0.344-1.823)  | .583    |                          |         |                          |         |
| MVI                                                  | Yes vs no        | 0.269 (0.111-0.651)  | .004    | 0.363 (0.127-1.035)      | .058    |                          |         |
| EHM                                                  | Yes vs no        | 0.547 (0.238-1.255)  | .155    |                          |         |                          |         |
| AST (U/L)                                            | > 40 vs ≤ 40     | 0.863 (0.367-2.030)  | .736    |                          |         |                          |         |
| ALT (U/L)                                            | > 40 vs ≤ 40     | 0.594 (0.259-1.361)  | .218    |                          |         |                          |         |
| NLR                                                  | > 3.0 vs ≤ 3.0   | 0.258 (0.092-0.724)  | .010    |                          |         |                          |         |
| Child-Pugh class                                     | B vs A           | 0.827 (0.329-2.078)  | .686    |                          |         |                          |         |
| ALBI grade                                           | 2/3 vs 1         | 0.695 (0.282-1.712)  | .429    |                          |         |                          |         |
| AFP decline > 15%                                    | Yes vs no        | 7.680 (3.027-19.487) | < .001  | 7.177 (2.504-20.573)     | < .001  | Not assessed             |         |
| CRAFITY score                                        | 2 vs 0/1         | 0.636 (0.279-1.449)  | .282    |                          |         | Not assessed             |         |
| Combined CRAFITY score and AFP response <sup>a</sup> | Group 1          | Referent             |         | Not assessed             |         | Referent                 |         |
|                                                      | Group 2          | 0.433 (0.145-1.292)  | .134    | Not assessed             |         | 0.568 (0.173-1.872)      | .353    |
|                                                      | Group 3          | 0.083 (0.022-0.320)  | < .001  | Not assessed             |         | 0.136 (0.032-0.576)      | .007    |
| Combination therapy <sup>b</sup>                     | Yes vs no        | 1.765 (0.560-5.564)  | .332    |                          |         |                          |         |

<sup>a</sup>Group 1: patients with a CRAFITY score of 0 or 1 and AFP response; Group 3: patients with a CRAFITY score of 2 and no AFP response; Group 2: patients who did not belong to Group 1 or 3. <sup>b</sup>Combination therapy includes tyrosine kinase inhibitors, radiofrequency ablation, transarterial chemoembolization, and stereotactic body radiotherapy for hepatocellular carcinoma. AFP, α-fetoprotein; ALBI, albumin-bilirubin; ALT, alanine aminotransferase; AST, aspartate aminotransferase; DM, diabetes mellitus; EHM, extrahepatic metastasis; HBV, hepatitis B virus; HCV, hepatitis C virus; TRAEs, treatment-related adverse events; M vs F, male versus female; MVI, macroscopic vascular invasion; NLR, neutrophil-to-lymphocyte ratio; TTV, total tumor volume.

CRAFITY score and AFP response predicts treatment outcomes of PD-1 based therapy

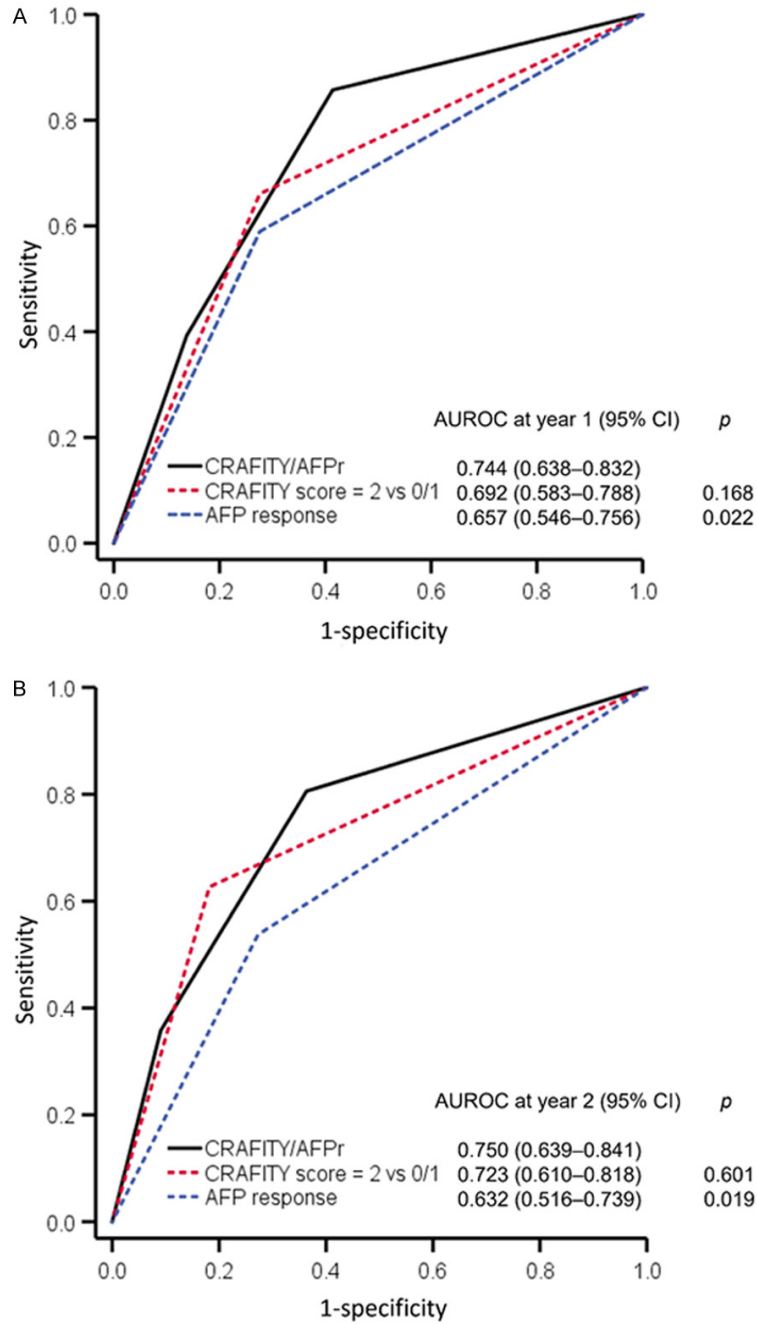

**Supplementary Figure 2.** Time-dependent AUROCs for the predictive performance of combined CRAFITY score and AFP response, CRAFITY score, or AFP response alone for OS. A. AUROCs at year 1. B. AUROCs at year 2. AFP,  $\alpha$ -fetoprotein; AUROC, area under the receiver operating characteristic curve; CRAFITY, C-reactive protein and  $\alpha$ -fetoprotein in immunotherapy; CRAFITY/AFP, combined CRAFITY score and AFP response; OS, overall survival. The *P* values relate to the other two parameters compared with CRAFITY response using the DeLong test.

CRAFITY score and AFP response predicts treatment outcomes of PD-1 based therapy

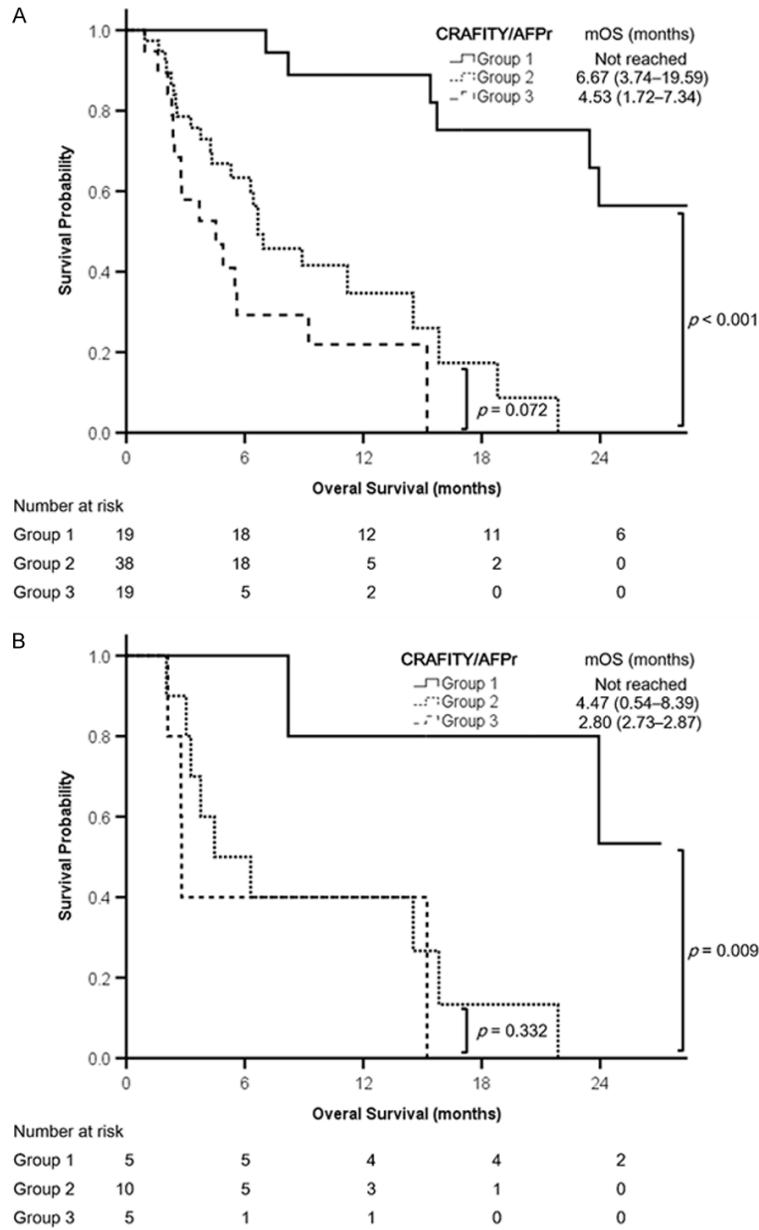

**Supplementary Figure 3.** Kaplan-Meier analyses of overall survival in different groups of patients according to the combination of CRAFITY score and AFP response (CRAFITY/AFP). A. A subgroup of patients receiving combined immune checkpoint inhibitor (ICI) and tyrosine kinase inhibitor therapy ( $n = 76$ ). B. A subgroup of patients receiving combined ICI and liver radiotherapy ( $n = 20$ ). Survival is presented as median (95% confidence interval). AFP,  $\alpha$ -fetoprotein; CRAFITY, C-reactive protein and  $\alpha$ -fetoprotein in immunotherapy; mOS, median overall survival.

CRAFITY score and AFP response predicts treatment outcomes of PD-1 based therapy

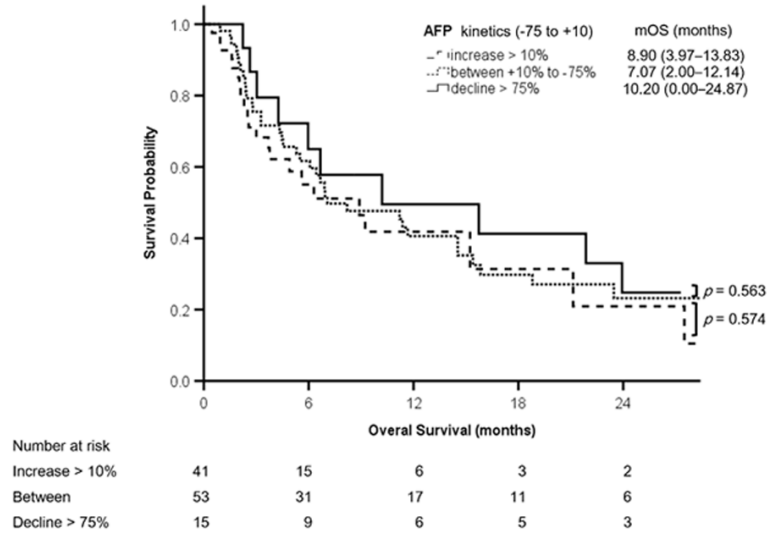

**Supplementary Figure 4.** Kaplan-Meier analysis of overall survival among groups stratified by Zhu's proposed AFP response [24]. AFP,  $\alpha$ -fetoprotein; mOS, median overall survival.
